# Supplementary material
Source: PubMed Central journal article supplement (PMC6369795)
Supplement: pnas.1819636116.sapp.pdf [file pnas.1819636116.sapp.pdf]

1 Supplementary information for:

2  
3 **One-megadalton metalloenzyme complex involved in benzene ring**  
4 **reduction beyond the biological redox window**  
5

6 Simona G. Huwiler, Claudia Löffler, Sebastian E. L. Anselmann, Hans-Joachim Stärk, Martin von  
7 Bergen, Jennifer Flechsler, Reinhard Rachel, and Matthias Boll  
8

9 Corresponding author: Matthias Boll  
10 Email: matthias.boll@biologie.uni-freiburg.de  
11

12 **This PDF file includes:**

13 Supplementary Material and Methods (pages 2-9)

14 Figs. S1 to S5 (pages 10-14)

15 Tables S1 to S9 (pages 15-23)

16 References for SI reference citations (page 24)  
17

## 18 **Supplementary Materials and Methods**

19

20 **Cultivation of cells.** *E. coli* strains were grown in LB medium with 100 µg mL<sup>-1</sup> kanamycin sulfate or  
21 100 µg mL<sup>-1</sup> ampicillin sodium salt and incubated over night at 37 °C. *G. metallireducens* GS-15  
22 (DSMZ 7210) wild type and *G. metallireducens* GS-15 pGM2087e1 were anaerobically cultivated in a  
23 200-l fermenter at 30°C or 28°C in a mineral salt medium (1) with benzoate (1-5 mM) as sole carbon  
24 source and nitrate (3-15 mM) as electron acceptor. Cells were harvested by centrifugation (20,000×g) in  
25 the exponential growth phase. *G. metallireducens* GS-15 pGM2087e10 was grown in a 1.8 L volume in  
26 the same media. The genetically modified *G. metallireducens* GS-15 strains were grown in the same  
27 media with 50 µg mL<sup>-1</sup> kanamycin sulfate in the presence of a fivefold concentration of selenium and  
28 tungsten (0.114 µM Na<sub>2</sub>SeO<sub>3</sub> and 0.121 µM Na<sub>2</sub>WO<sub>4</sub>). *G. metallireducens* cells were stored in liquid  
29 nitrogen.

30

31 **Homologous expression of single and Twin-Strep-tagged BamB.** General molecular biology  
32 techniques were performed according to standard protocols (2). The genomic DNA of *G. metallireducens*  
33 GS-15 was obtained by chloroform/phenol/isoamylalcohol extraction as described in (3). For  
34 homologous expression of single and Twin-Strep-tagged BamB expression plasmids pGM2087e1 and  
35 pGM2087e10 were generated (Table S9). All PCR-amplification reactions from genomic or plasmid  
36 DNA were performed with Pfu-polymerase. For construction of pGM2087e1 the 198-bp upstream region  
37 of *bamB* and *bamB* (gene locus: Gmet\_2087 (former), GMET\_RS10525 (new)) were amplified from  
38 *G. metallireducens* GS-15 genomic DNA with a primer-encoded C-terminal Strep-tag II<sup>®</sup> using primers  
39 bamB\_22\_for (5'- ATCCCCCTCGAGCGGCAGCGCGCCCGGTG -3') and bamB\_3\_rev (5'-  
40 TCTAGAACTAGTTCATTTTCGAACTGCGGGTGGCTCCAACCGGCCGACAGAATCCCG -3'). In  
41 primer sequences restriction sites are underlined. For generation of pGM2087e10 *bamB* was amplified  
42 from genomic DNA of *G. metallireducens* GS-15 with primer pair pPR\_B\_69\_for (5'-  
43 GAATTCGAGCTCTGACCTAAGGAGGTAATAATGAGGTATGCAGAGACCGGA -3') and  
44 pPR\_B\_70\_rev (5'- GTCGACCTCGAGACCGGCCGACAGAATCCCG -3') for insertion into pPR-  
45 IBA101, resulting in pPR-GM2087e10. The later plasmid was used as a template for amplification with  
46 primers bamB\_84\_for (5'- TGCCGCTCAAGCTTTCCATG -3') and bamB\_85\_rev (5'-  
47 GGCCGCTCTAGATTATTATTTTCGAACTGCGGGT -3') to clone the resulting *HindIII* / *XbaI* PCR  
48 fragment, containing the last 659 bp of *bamB* with attached sequence encoding a C-terminal linker  
49 LEVDLQGDHGLSA and a Twin-Step-tag<sup>®</sup> into pGM2087e10. PCR products, cut insert and according  
50 source plasmid were purified either by precipitation or by the Wizard<sup>®</sup> SV gel and PCR clean-up system  
51 (Promega, Mannheim, D) or the QIAquick<sup>®</sup> gel extraction kit (QIAGEN GmbH, Hilden, D) according to

52 manufacturer's instructions. Insert PCR products and source plasmids were digested with the respective  
53 restriction enzymes (New England BioLabs® Inc. (NEB), Ipswich, Massachusetts, USA). The cut vectors  
54 were dephosphorylated with Antarctic phosphatase (NEB). Ligation was performed with T4 DNA ligase  
55 (fermentas). Ligation mixtures were transformed into *E. coli* JM109 or TOP10 by heat shock or  
56 electroporation and cell mixture was plated on LB agar plates with appropriate antibiotics. Insert length of  
57 target plasmids were verified by a PCR using biomass of single colonies with GoTaq Green Master Mix  
58 (Promega) and appropriate primers. Plasmids were purified from the according *E. coli* strains with the  
59 Wizard® Plus SV Minipreps DNA purification system (Promega) or the QIAprep® Spin Miniprep kit  
60 (Qiagen) according to manufacturer's instructions. Insert and adjoining vector regions were verified by  
61 Sanger sequencing. Electroporation of *G. metallireducens* GS-15 was performed according to (4) whereas  
62 mineral medium with benzoate as carbon source was used in all steps. For preparation of  
63 electrocompetent *G. metallireducens* GS-15 harvesting and washing of the cells occurred at ~2,900×g.  
64 For transformation at 17 kV cm<sup>-1</sup> 100 ng of pGM2087e1 or 250 ng of pGM2087e10 was used. Additional  
65 control PCRs on cell mass were performed to check for the presence of the plasmid insert of pGM2087e1  
66 or pGM2087e10 in the cultures itself with appropriate primers and GoTaq Green Master Mix (Promega).  
67 All enrichments were performed at 4-17°C in an anaerobic glove box (N<sub>2</sub>:H<sub>2</sub>, 95:5 by volume).

68  
69 **Enrichment of Strep-tagged BamB.** Bam(B<sub>Strep</sub>C)<sub>2</sub> was purified using either a Strep-Tactin® Superflow®  
70 high capacity column followed by a Source 15Q anionic exchange column (GE Healthcare, Munich, D),  
71 and used for determination of K<sub>m</sub>-values or ICP-MS analysis. Alternatively, it was obtained as a side  
72 product from the Bam[(B<sub>Strep</sub>C)<sub>2</sub>DEF]<sub>2</sub> subcomplex purification by collecting and concentrating a peak  
73 eluting between 62-72 ml during size exclusion chromatography (for all other analyses, see section  
74 'Enrichment of Bam[(B<sub>Strep</sub>C)<sub>2</sub>DEF]<sub>2</sub>'). Between 25-90 g cells (wet weight) of *G. metallireducens* GS-15  
75 pGM2087e1 were suspended 1:2 (w/v) in cell disruption buffer (20 mM triethanolamine (TEA)/NaOH,  
76 5 mM MgCl<sub>2</sub>, 500 mM KCl, pH 7.8) containing 0.02 mg mL<sup>-1</sup> DNaseI, 0.05 mg mL<sup>-1</sup> DTE and 1 mg mL<sup>-1</sup>  
77 lysozyme. After ultracentrifugation (optima L-60, rotor 60 TI, Beckman Coulter GmbH, Krefeld, D) for  
78 1 h at 100,000×g the supernatant was removed and the membrane fraction was washed with wash buffer  
79 (20 mM TEA/NaOH, 5 mM MgCl<sub>2</sub>, 150 mM NaCl, pH 7.8). After the second centrifugation for 1 h at  
80 100,000×g both supernatants were pooled and centrifuged again for 10 min at 2,900-3,800×g. The  
81 supernatant of the later centrifugation was loaded with 0.5-1 mL min<sup>-1</sup> onto a wash buffer pre-  
82 equilibrated 25-70 ml Strep-Tactin® Superflow® high capacity column. The column was washed with  
83 wash buffer for 2-3 column volumes at 0.5-1 mL min<sup>-1</sup> before elution with wash buffer containing 5 mM  
84 D-desthiobiotin. The elution peak fraction was further purified by a 5-mL or 15-mL Source 15Q column,  
85 pre-equilibrated with wash buffer. The elution fraction of the Strep-Tactin column was applied with a

86 50 mL super loop. The loading and purification on the column was performed at 2 or 4-5 mL min<sup>-1</sup>. After  
87 washing with one column volume with wash buffer, a linear gradient over fifty column volumes was  
88 applied from 150-300 mM NaCl. The Bam(B<sub>Strep</sub>C)<sub>2</sub>-containing fraction eluted at ~175 mM NaCl, and  
89 was concentrated in 30-kDa microconcentrators (Vivaspin 6, Sartorius, Göttingen, D) by centrifugation at  
90 ~2,900×g. Bam(B<sub>Strep</sub>C)<sub>2</sub> was anaerobically stored at -80°C or in liquid nitrogen after addition of 5 %  
91 (w/v) polyethylene glycol 4000 (final concentration).

92  
93 **Enrichment of Twin-Strep-tagged BamB<sub>2xStrep</sub>C.** BamB<sub>2xStrep</sub>C was purified from 1.3 g of  
94 *G. metallireducens* GS-15 pGM2087e10 wet cells with the same protocol as used for BamB<sub>Strep</sub>C with a  
95 Strep-Tactin<sup>®</sup> column. A 1-mL Strep-Tactin<sup>®</sup> Superflow<sup>®</sup> high capacity column was used and washed for  
96 12 column volumes after loading. A different cell disruption buffer (100 mM Tris/HCl, 500 mM NaCl,  
97 5 mM MgCl<sub>2</sub>, pH 8.0) and wash buffer (100 mM Tris/HCl, 500 mM NaCl, pH 8.0) were used.

98  
99 **Enrichment of Bam(BC)<sub>2</sub>.** Purification of Bam(BC)<sub>2</sub> from *G. metallireducens* GS-15 wild type for  
100 comparison was performed as described (5).

101  
102 **Synthesis and analysis of CoA esters.** Benzoyl-CoA was synthesized from benzoic acid anhydride and  
103 CoA (6). 1,5-Dienoyl-CoA was synthesized enzymatically with enriched BCR from *Thauera aromatica*  
104 from benzoyl-CoA and the product was purified by preparative HPLC as described earlier (7). UPLC-  
105 ESI-Q-TOF analyses of benzoyl-CoA and 1,5-dienoyl-CoA was carried out as recently described (7).

106  
107 **DCO and NOR activity assays.** The 1,5-dienoyl-CoA:methyl viologen oxidoreductase (DCO) activity  
108 was determined as described earlier with 0.1 or 0.2 mM 1,5-dienoyl-CoA and 0.5 mM methyl viologen at  
109 pH 6.8 (5). The time dependent reduction of methyl viologen was followed at 730 nm ( $\Delta\epsilon = 2,400 \text{ M}^{-1} \text{ cm}^{-1}$ )  
110 <sup>1</sup>). The typical assay contained 150 mM Mops/KOH (pH 7.2), 15 mM MgCl<sub>2</sub>, 150 mM NaCl, 2 mg mL<sup>-1</sup>  
111 BSA, 1 mM methyl viologen, 0.1 mM 1,5-dienoyl-CoA, and 0.7-3 µg enzyme sample. Analogously, the  
112 NAD(P)H:benzyl viologen oxidoreductase (NOR) activity was determined by measuring the absorbance  
113 increase caused by dye reduction ( $\Delta\epsilon_{600} = 7,400 \text{ M}^{-1} \text{ cm}^{-1}$ ) in the presence of 0.5 mM NAD(P)H and  
114 1 mM benzyl viologen. *K<sub>m</sub>*-value for NADH was determined by altering NADH concentrations from 15-  
115 480 µM and by fitting the initial rates to Michaelis-Menten curves using the Prism software package  
116 (GraphPad, San Diego, CA). In discontinuous assays substrate consumption and product formation was  
117 analyzed by HPLC. Such assays were carried out in reaction tubes in a glove box at 30°C under a N<sub>2</sub>/H<sub>2</sub>  
118 atmosphere (95 % /5 %). Samples were taken at different time points, stopped with 2 volumes methanol  
119 and analyzed by HPLC as described (8). *K<sub>m</sub>* for DCO activity of Bam(B<sub>Strep</sub>C)<sub>2</sub> was determined in a

120 slightly modified reaction buffer (175 mM MOPS/NaOH, 3.5  $\mu$ M MgCl<sub>2</sub>, 150 mM NaCl, 1.75 mg ml<sup>-1</sup>  
121 BSA, pH 6.8) with 1 mM methyl viologen and 1,5-dienoyl-CoA concentrations ranging from 10–100  $\mu$ M.  
122 Two to three measurements of DCOR activity at one specific 1,5-dienoyl-CoA concentration were made.  
123 Evaluation was carried out with Prism as indicated above.

124  
125 **Preparation of crude extracts for purification the class II benzoyl-CoA reductase complex**  
126 **Bam[(BC)<sub>2</sub>DEFGHI]<sub>2</sub> from wild type *G. metallireducens* and subcomplex Bam[(B<sub>Strep</sub>C)<sub>2</sub>DEF]<sub>2</sub>.** For  
127 the preparation of crude extract 2-50 g cells (wet weight) were anaerobically suspended in buffer A  
128 (50 mM potassium phosphate, 5 mM MgCl<sub>2</sub>), pH 6.5-7.5 (1-2 ml g<sup>-1</sup> cells) containing 100 mM KCl,  
129 10 mM dithioerythriol, 1-20 mg DNase I; for enrichment of Strep-tagged components of  
130 *G. metallireducens* GS-15 pGM2087e1 by affinity chromatography 2.4 % Triton X-100 (w/v) was  
131 additionally added. Cell lysis was accomplished by stirring at 4° C for 1 h using 2-50 mg lysozyme. After  
132 centrifugation with 100,000 $\times$ g (1 h at 4°C) the supernatant was used for further studies. In case of  
133 purification with help of BamB<sub>Strep</sub>, the pellet was washed in buffer A containing 100 mM KCl, pH 7.5  
134 and centrifuged again (100,000g, 1 h at 4°C). The supernatants were combined.

135  
136 **Enrichment of Bam[(B<sub>Strep</sub>C)<sub>2</sub>DEF]<sub>2</sub>.** The 100,000 $\times$ g supernatant of 30 g cells (wet mass) of  
137 *G. metallireducens* GS-15 pGM2087e1, producing BamB<sub>Strep</sub>, was applied to a Strep-Tactin Superflow  
138 high capacity column (25 ml volume, IBA), which had been equilibrated with buffer B (50 mM  
139 potassium phosphate, 5 mM MgCl<sub>2</sub>, 100 mM KCl, pH 7.5). After washing the column at a flow rate of  
140 1 mL min<sup>-1</sup> with 2 column volumes of buffer B the protein was eluted with 5 mM desthiobiotin in  
141 buffer B. The 30 mL eluate of the affinity column was concentrated in microconcentrators (10-kDa  
142 exclusion limit, Vivaspin 6, Sartorius, Göttingen, D) by centrifugation to 1.5 ml and applied in two runs  
143 to a Superdex 200 column (1 cm diameter, 120 mL column volume, 0.5 mL min<sup>-1</sup> flow rate, GE  
144 Healthcare), which had been equilibrated with buffer B. The Bam[(B<sub>Strep</sub>C)<sub>2</sub>DEF]<sub>2</sub> complex eluted  
145 between 47-60 ml, Bam(B<sub>Strep</sub>C)<sub>2</sub> eluted between 62-72 mL. The enzymes were concentrated to 12-  
146 25 mg mL<sup>-1</sup> and stored in anaerobic glass vials at -80°C.

147  
148 **Enrichment of Bam[(BC)<sub>2</sub>DEFGHI]<sub>2</sub> from wild type.** After centrifugation with 100,000 $\times$ g the  
149 supernatant of 50 g wild type cells (wet weight) was applied step-by-step to a DEAE Sepharose column  
150 (Fast Flow, 35 ml volume, 2.6 cm diameter, GE Healthcare) which had been equilibrated with buffer A,  
151 pH 6. Each 10-ml supernatant volume was applied and the column was washed with 10 ml buffer A with  
152 200 mM KCl at pH 6. After the last application step the column was washed with 2 column volumes  
153 buffer A with 200 mM KCl at pH 6. A step gradient with one column volume of buffer A with 225, 250,

154 275, 300 and 325 mM KCl was used for protein elution. The fractions containing DCO and NOR activity  
155 eluted from 275-325 mM KCl within 76 ml. The fractions were concentrated in microconcentrators  
156 (10 kDa exclusion limit) by centrifugation to 1 ml and applied in two fractions to a Superdex 200 (1 cm  
157 diameter, 120 ml column volume, 0.5 ml min<sup>-1</sup> flow rate), which had been equilibrated with buffer A with  
158 100 mM KCl at pH 6. The DCO and NOR activity eluted between 45-51 mL. The enzymes were  
159 concentrated to 10 mg mL<sup>-1</sup> and stored in anaerobic glass vials at -80°C. The purification was also  
160 performed by addition of 5 μM FAD, 5 μM FMN and 2 mM DTE in each purification buffer.

161  
162 **Enrichment of ferredoxin from *G. metallireducens*.** To purify ferredoxin (Fd) from *G. metallireducens*  
163 the 100,000×g supernatant of 20 g wild type cells (wet weight) was applied to a DEAE Sepharose column  
164 (35 ml volume, 2.6 cm diameter), which had been equilibrated with buffer A at pH 7.2. The column was  
165 washed at a flow rate of 1 mL min<sup>-1</sup> with one column volume of buffer A at pH 7.2, followed by one  
166 column volume buffer A at pH 7.2 with 100 and 200 mM KCl each. The brownish fraction was eluted in  
167 a third step gradient at 300 mM KCl in buffer A at pH 7.2 within 24 ml. The fraction was concentrated in  
168 microconcentrators (10-kDa exclusion limit) by centrifugation to 1 mL and applied to a Superdex 200  
169 (1 cm diameter, 120 ml column volume, 0.5 ml min<sup>-1</sup> flow rate), which had been equilibrated with  
170 100 mM KCl in buffer A at pH 7.2. The low molecular weight fraction with a dark brownish color eluted  
171 in a volume of 12 mL. This fraction was applied to a MonoQ 5/50 column (1 ml volume, 0.5 ml min<sup>-1</sup>  
172 flow rate, GE Healthcare) which was washed with 5 column volumes of buffer A. Fd eluted in a linear  
173 gradient from 0-500 mM KCl in buffer A at pH 7.2 over 30 column volumes between 280-410 mM KCl.  
174 The concentration of purified Fd was determined by using the molar extinction coefficient of ε<sub>390nm</sub> =  
175 30,000 M<sup>-1</sup> cm<sup>-1</sup> (9). The 2-oxoglutarate:Fd oxidoreductase from *T. aromatica* was enriched as described  
176 (10).

177  
178 **Enzyme assays with enriched class II BCR complexes other than DCO and NOR activity.** 1)  
179 Reduction of Fd by 1,5-dienoyl-CoA: The assay was carried out in anaerobic quartz cuvettes (100% N<sub>2</sub>)  
180 at room temperature. The mixture contained buffer A (pH 6), 2 mg mL<sup>-1</sup> BSA, 0.1 mM 1,5-dienoyl-CoA,  
181 10-50 μM Fd and 1.5-5 μg class II BCR. Reduction of Fd was followed by the absorbance decrease at  
182 390 nm. 2) Reduction of NAD<sup>+</sup> by 1,5-dienoyl-CoA: The assay was carried out in reaction tubes in the  
183 glove box at 30°C under a N<sub>2</sub>/H<sub>2</sub> atmosphere (96% /4%). The mixture contained buffer A (pH 6),  
184 2 mg mL<sup>-1</sup> BSA, 0.1 mM 1,5-dienoyl-CoA, 0.5 μM NAD<sup>+</sup>, 20 μM FAD and 1.5-2.5 μg class II BCR. 3)  
185 Reduction of NAD<sup>+</sup> with reduced Fd: The assay was carried out in reaction tubes in the glove box at 30°C  
186 under a N<sub>2</sub>/H<sub>2</sub> atmosphere (96% /4%). The mixture contained buffer A (pH 6), 2 mg mL<sup>-1</sup> BSA, 10 μM  
187 Fd, 5 mM 2-oxoglutarate, 2.5 mM CoA, 0.5 U KGOR<sub>Taro</sub>, 20 μM FAD, 0.5 μM NAD<sup>+</sup> and 1.5-2.5 μg

188 class II BCR. 4) Reduction of benzoyl-CoA and NAD<sup>+</sup> with reduced Fd (electron bifurcation): In  
189 comparison to (3) this assays additionally contained 0.2 mM benzoyl-CoA. Formation of NADH and/or  
190 1,5-dienoyl-CoA was analyzed by UPLC® (see below). The setup of all other electron bifurcation assays  
191 is shown in Table S7.

192  
193 **UPLC analysis of CoA esters.** CoA esters analysis was carried out using an Acquity UPLC® (ultra high  
194 performance liquid chromatography, H-Class, Waters GmbH, Eschborn, D). The CoA esters were applied  
195 to a C<sub>18</sub> reversed-phase column (2.1 x 100 mm, Acquity UPLC BEH C18, 1.7 µm particle size, 130 Å  
196 pore size, Waters, using a VanGuard pre-column, 2.1 x 5 mm). The column was equilibrated with 12%  
197 acetonitrile (v/v) in 50 mM potassium phosphate buffer pH 6.8 at 0.2 mL<sup>-1</sup> min<sup>-1</sup>. The applied gradient  
198 was 0-0.01 min, 12-15% acetonitrile; 0.01-2.8 min, 15-30% acetonitrile; 2.8-5 min 12% acetonitrile.

199  
200 **Determination of molecular mass.** The native molecular masses of the class II BCR complexes were  
201 determined by analytical gel filtration via Superdex 200 (1 cm diameter, 120 mL column volume, GE  
202 Healthcare 0.5 ml min<sup>-1</sup> flow rate) using 50 mM potassium phosphate buffer with 5 mM MgCl<sub>2</sub> and  
203 100 mM KCl at pH 6 or pH 7.5. The column was calibrated with thyroglobulin (670 kDa), apoferritin  
204 (443 kDa), catalase (245 kDa), and BSA (130 and 67 kDa).

205  
206 **Densitometrical analysis.** The stoichiometric ration of the subunits was determined by densitometry in  
207 Coomassie-stained SDS/PAGE gels at 302 nm (ChemiDoc™ XRS+, Bio-Rad Laboratories GmbH). The  
208 band intensity was normalized according to molecular weights. Different SDS/PAGE conditions, protein  
209 preparations and applied protein amounts were used to determine the proportion of the subunits.

210  
211 **Identification of peptides by MS analysis.** Excised SDS/PAGE protein gel bands of interest were  
212 digested by trypsin, whereas the Fd was digested in solution. Peptides were analyzed by UPLC-LTQ  
213 Orbitrap-MS/MS according to Bastida (2010) (11). A nanoAcquity column was used (C<sub>18</sub>, 75 µm ×  
214 10 cm, 1.75 µm, Waters). Using a MASCOT platform, the best peptide matches were obtained.

215  
216 **Determination of metal cofactors and flavin.** The content of iron was determined colorimetrically  
217 according to Lovenberg (1964) (12) for Bam[(B<sub>S<sub>tr</sub>ep</sub>C)<sub>2</sub>DEF]<sub>2</sub> and Bam[(BC)<sub>2</sub>DEFGHI]<sub>2</sub>. W, Zn, Se and  
218 Fe for Bam(B<sub>S<sub>tr</sub>ep</sub>C)<sub>2</sub> were determined by ICP-MS analysis. Samples for ICP-MS were prepared and  
219 measured as described for W and Zn (5). For Fe and Se an analogous procedure was utilized. The  
220 following isotopes were used for ICP-MS measurements: <sup>56</sup>Fe, <sup>66</sup>Zn, <sup>77</sup>Se and <sup>184</sup>W. <sup>103</sup>Rh was applied as  
221 internal standard for <sup>56</sup>Fe, <sup>66</sup>Zn and <sup>77</sup>Se, <sup>185</sup>Re was applied as internal standard for <sup>184</sup>W. For the elements

222 Fe, Se and W mass resolution 4000 and for Zn mass resolution 10000 were used (Element XR, Thermo  
223 Fisher Scientific, Bremen). Buffer without protein was used as a reference. Three technical replicates for  
224 ICP-MS measurement were made three times. Sample preparation, including purification and ICP-MS  
225 measurement, was conducted two times independently for the Bam[(BC)<sub>2</sub>DEFGHI]<sub>2</sub> and  
226 Bam[(B<sub>Strep</sub>C)<sub>2</sub>DEF]<sub>2</sub> complexes of *G. metallireducens*. Sample purification, preparation and ICP-MS  
227 measurement for Bam(B<sub>Strep</sub>C)<sub>2</sub> was conducted once. To analyze the flavin cofactors the enzyme was  
228 precipitated with 25 mM H<sub>2</sub>SO<sub>4</sub> (pH 2-2.5) and incubated 15 min in the dark at 0°C. The 13.000g pellet  
229 was washed once with H<sub>2</sub>SO<sub>4</sub>. Both supernatants were combined and analyzed by HPLC. The spectra and  
230 retention times were compared with standards flavin adenine dinucleotide (FAD), flavin mononucleotide  
231 (FMN) and riboflavin.

232  
233 **UV/vis spectroscopy.** UV/vis spectra of approximately 1 µM purified enzyme complexes in buffer A, pH  
234 6 containing 2 mg ml<sup>-1</sup> BSA were recorded with a UV-1650PC Shimadzu spectrophotometer in a gas-  
235 tight quartz cuvette under anaerobic conditions. The enzymes were reduced with 50 µM 1,5-dienoyl-CoA,  
236 50 µM sodium dithionite, 25 µM NADH or by 50 µM 2-oxoglutarate, 50 µM coenzyme A, 0.5 µM Fd  
237 from *G. metallireducens*, and 0.2 U KGOR from *T. aromatica*.

238  
239 **Phylogenetic analysis of BamE.** The BamE sequence of *G. metallireducens* (Gmet\_2084) was used as  
240 query sequence to identify BamE-like enzymes using Protein-BLAST. The chosen 172 sequences showed  
241 >40 % amino acid sequence identities and were predicted to contain at least one FAD binding site. The  
242 alignment of the sequences was calculated by using the MUSCLE algorithm (13). The replication setting  
243 was 1000. All ambiguous positions were removed for each sequence pair. The phylogenetic tree was  
244 created with the MEGA5 software package (Neighbor joining method) (14).

245  
246 **Western blot analysis.** For Western blot analysis of BamF the membrane and soluble fraction of  
247 *G. metallireducens* cells grown on benzoate and acetate were transferred (transfer buffer: 50 mM tris,  
248 40 mM glycine, 20% MeOH) from an SDS/PAGE-gel to a nitrocellulose membrane using the semi-dry  
249 blotting method. After the transfer, the membrane was incubated with blocking buffer (PBST: 290 mM  
250 Na<sub>2</sub>HPO<sub>4</sub>, 85 mM NaH<sub>2</sub>PO<sub>4</sub>, 340 mM NaCl, 0.1% Tween 20, 5% (w/v) BSA, pH 7.3) for 2 h at room  
251 temperature. The membrane was subsequently incubated with 0.5 µg mL<sup>-1</sup> primary polyclonal BamF  
252 antibody (Davids Biotechnologie, Regensburg, D) in PBS (290 mM Na<sub>2</sub>HPO<sub>4</sub>, 85 mM NaH<sub>2</sub>PO<sub>4</sub>,  
253 340 mM NaCl, pH 7.3) at 4° C overnight. Thereafter the membrane was incubated with 0.5 µg mL<sup>-1</sup>  
254 secondary antibody (Thermo Fisher Scientific, Karlsruhe, D) (in PBS) which was conjugated with  
255 alkaline phosphatase. NBT (nitro blue tetrazolium chloride)/BCIP (5-bromo-4-chloro-3-indolyl



256 phosphate) were used for the detection. Between each incubation step, the membrane was washed three  
257 times (PBS, PBST, PBS, each 5 minutes).

258  
259 **Electron microscopy and immunogold labeling.** For electron microscopy analysis, freshly grown cells  
260 were concentrated via filtration through a polycarbonate membrane with a pore size of 0.2  $\mu\text{m}$ .  
261 Afterwards, cells were immediately high-pressure-frozen (Leica EM Pact2, Leica Microsystems GmbH,  
262 Wetzlar, D) and freeze-substituted (Leica AFS 2, Leica Microsystems GmbH, Wetzlar, D) in acetone  
263 containing 0.5 % (v/v) glutardialdehyde, 0.25 % (w/v) uranyl acetate and 5 % (v/v) water according to the  
264 following protocol:  $-90^{\circ}\text{C}$  for 8 h, heating to  $-60^{\circ}\text{C}$  within 1 h,  $-60^{\circ}\text{C}$  for 6 h, heating to  $-40^{\circ}\text{C}$  within  
265 1 h,  $-40^{\circ}\text{C}$  for 7 h. After washing cells three times with acetone, cells were infiltrated with Lowicryl  
266 HM20 and polymerized under UV light at  $-40^{\circ}\text{C}$ . Immunogold labeling was performed according to  
267 Rachel *et al.*, 2010 (15). For this purpose, ultrathin sections of 50-70 nm were prepared in a Leica UC7  
268 ultramicrotome using a diamond knife. Polyclonal primary antisera directed against BamF was used in  
269 dilution of 1:50. For detection, goat-anti-rabbit coupled to ultrasmall gold particles were used.  
270 Immunogold labeling was followed by silver enhancement. Transmission EM analyses were performed  
271 on a 120 kV Philips CM12 (FEI, Hillsboro, OR, USA) equipped with a slow-scan CCD camera  
272 (TVIPS0124, 1k x 1k pixels, TVIPS GmbH, Gauting, D). For digital documentation, the software EM-  
273 Menu 4.0 (TVIPS, Gauting, D) was used.

274  
275 **Further determinations.** Proteins were stained using SimplyBlue SafeStain (Invitrogen, Darmstadt, D).  
276 Protein concentrations were routinely determined by the Bradford method using BSA as standard. The  
277 protein concentration of samples including Triton X-100 was measured with the BCA kit (Interchim,  
278 Montluçon, F).

279

280

281

282

283

284

285

286

287

288

289

290  
291  
292  
293  
294  
295  
296  
297  
298  
299  
300  
301  
302  
303  
304  
305  
306  
307

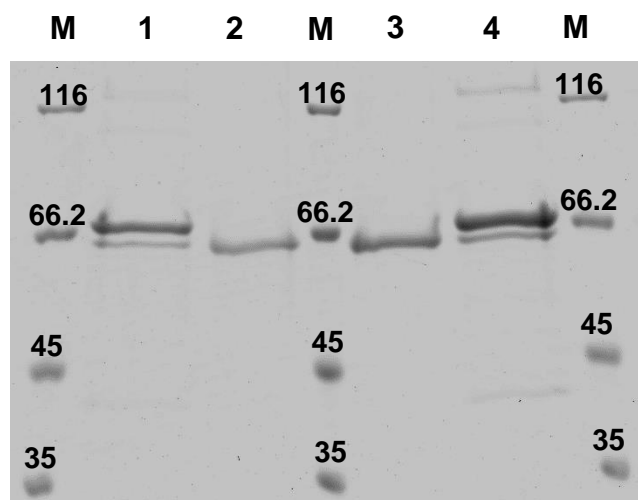

308 **Fig. S1.** Exchange of plasmid-encoded homologously produced BamB<sub>2×Strep</sub> with genomically encoded BamB in  
309 Bam(BC)<sub>2</sub> complexes. SDS/PAGE analysis (8%) of enriched BamB derived from homologously produced  
310 Bam(B<sub>2×Strep</sub>C)<sub>2</sub> complexes (lanes 1,4) and from wild-type Bam(BC)<sub>2</sub> complexes (lanes 2,3). Lane M = molecular  
311 weight marker (masses in kDa) . Lanes 1,2: 1.5 µg protein; lanes 3,4: 3 µg protein. The two bands at approximately  
312 66.2 kDa correspond to BamB<sub>2×Strep</sub> (upper band, ≈76% of total BamB) and wild type BamB (lower band, ≈24% of  
313 total BamB). Subscript '2×Strep' refers to a C-terminal Twin-Strep-tag®.  
314

315

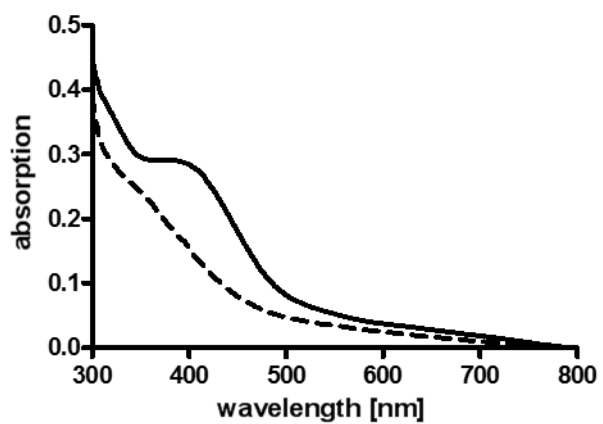

316

317 **Fig. S2.** UV/vis spectra of enriched ferredoxin from *G. metallireducens*. 10  $\mu$ M oxidized ferredoxin as isolated  
318 (solid line) and after reduction (dashed line) by 2-oxoglutarate (0.1 mM), coenzyme A (0.1 mM) and enriched  
319 KGOR<sub>Taro</sub> (0.1 U) for 5 min.

320

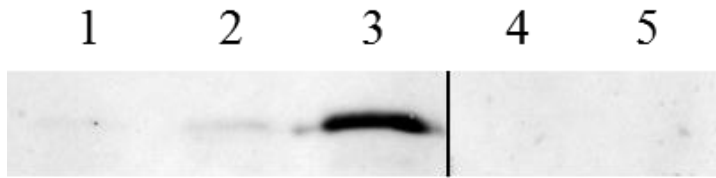

321  
322  
323  
324  
325  
326

**Fig. S3.** Western blot analysis using polyclonal antibodies against BamF. Cell extract (lanes 1,4) and membrane protein fraction (lanes 2,5) of *G. metallireducens* cells grown on benzoate (lanes 1,2) and acetate (lanes 4,5); lane 3, isolated Bam[(BC)<sub>2</sub>DEFGHI]<sub>2</sub>. In each lane 1.5 µg of protein was applied.

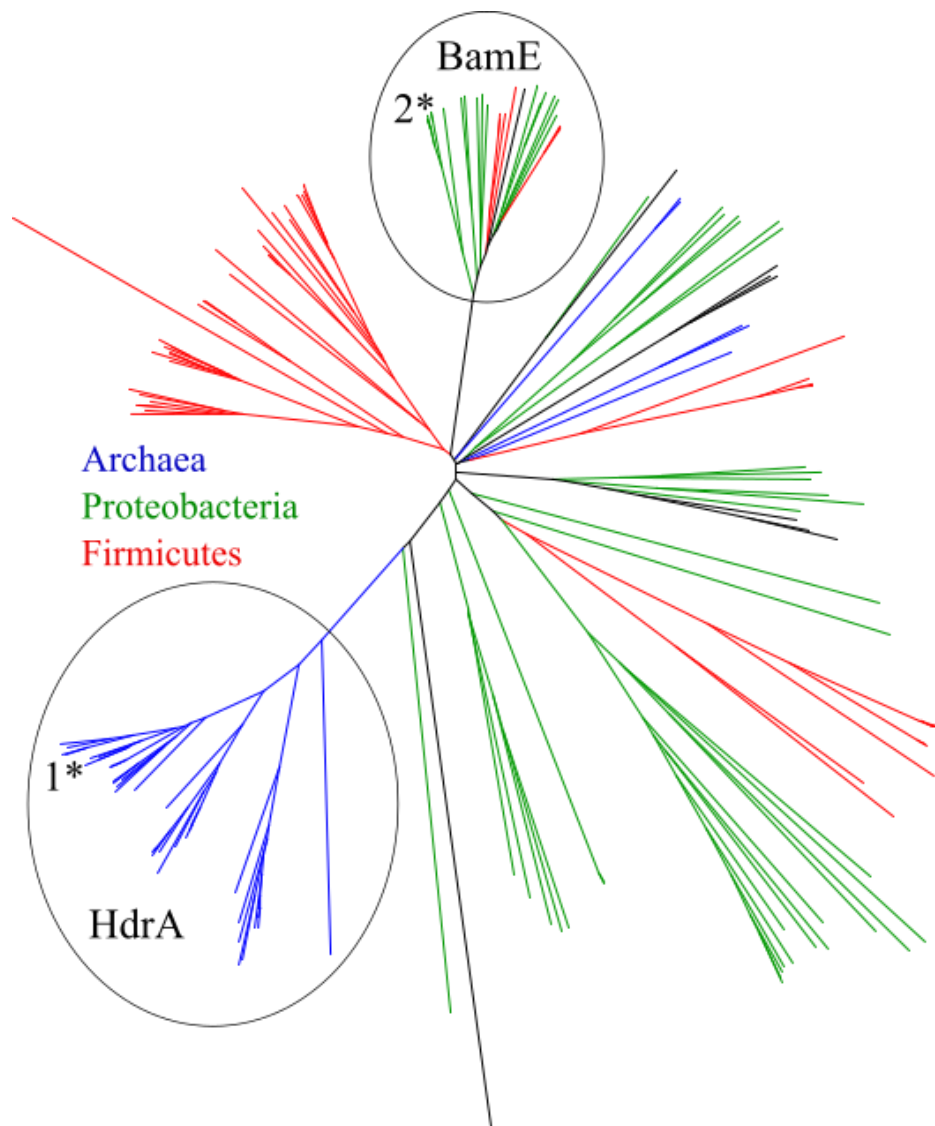

327

328 **Fig. S4.** Phylogenetic tree of HdrA-like components harboring at least one characteristic binding motif for electron  
 329 bifurcating FAD. Color code: archaeal (blue), proteobacterial (green), firmicital (red) and other (black) HdrA-like  
 330 components. The clusters comprising true HdrAs from methanogens and BamEs from aromatic compound  
 331 degrading obligately anaerobic bacteria are encircled. 1\*, HdrA from *M. thermolithotrophicus*; 2\*, BamE from  
 332 *G. metallireducens*. The phylogenetic tree was generated based on 172 amino acid sequences using the neighbor-  
 333 joining method.

334

335  
336  
337  
338

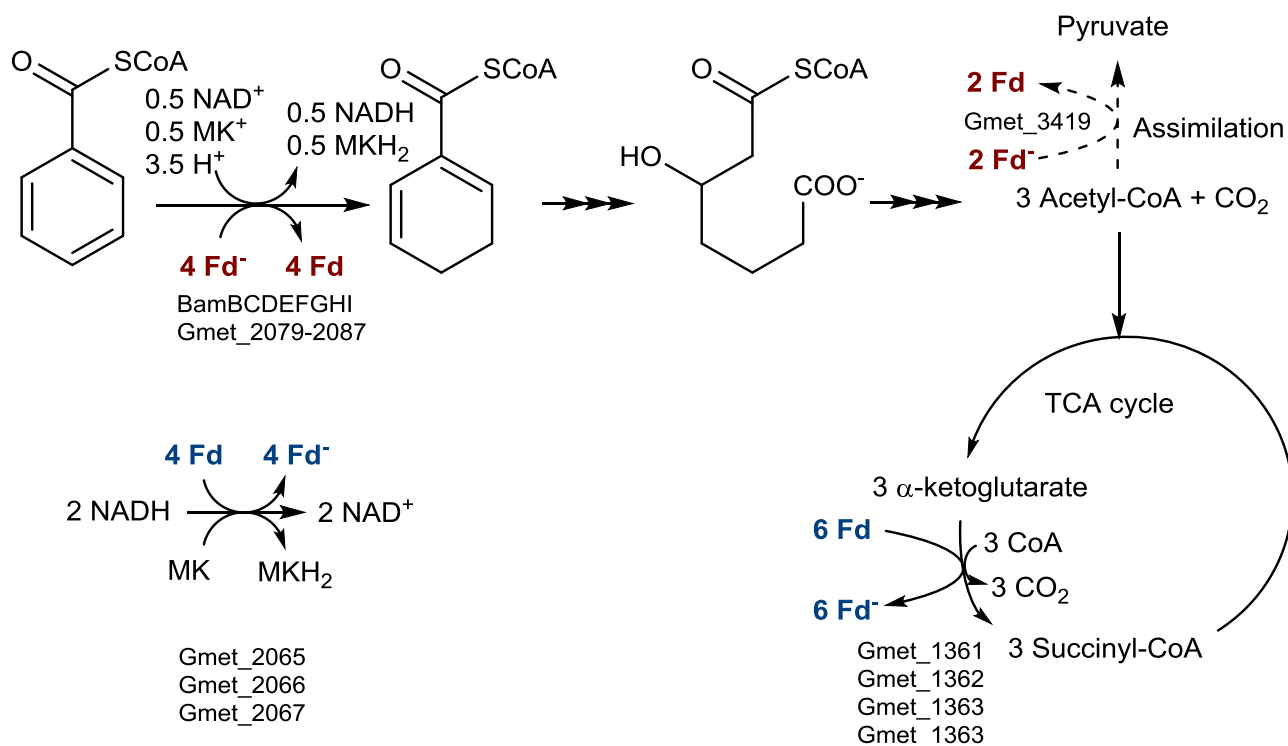

339  
340  
341  
342  
343

344 **Fig. S5.** Predicted ferredoxin reducing (blue) and oxidizing (red) reactions in *G. metallireducens* during growth with  
 345 aromatic compounds. Per benzoyl-CoA reduced 4 Fd<sup>-</sup> are oxidized assuming a double flavin-based electron  
 346 bifurcation with MK and NAD<sup>+</sup> serving as high-potential acceptors. Three acetyl-CoA are formed from benzoyl-  
 347 CoA in the benzoyl-CoA degradation pathway that are completely oxidized in the TCA cycle. The gene products  
 348 annotated as  $\alpha$ -ketoglutarate:ferredoxin oxidoreductase (KGOR) and pyruvate synthase have not been  
 349 experimentally verified. Gmet\_2065-2067 are proposed to be involved in endergonic ferredoxin reduction by  
 350 NADH coupled to the exergonic reduction of MK by the same donor. Gmet\_2066/Gmet\_2067 code for putative  
 351 electron bifurcating ETF  $\alpha\beta$ -subunits that harbor a Fd-domain with two predicted [4Fe-4S] clusters; Gmet\_2065  
 352 codes for a putative membrane bound ETF:MK oxidoreductase. The combined action of KGOR and electron  
 353 bifurcating ETF guarantees a high Fd<sup>-</sup>/Fd ratio required for unidirectional benzoyl-CoA reduction.

354

355 **Table S1. UPLC-LTQ Orbitrap-MS/MS analysis of protein bands obtained during the enrichments of Bam[(BC)<sub>2</sub>DEFGHI]<sub>2</sub> and Bam[(B<sub>Strep</sub>C)<sub>2</sub>DEF]<sub>2</sub>**  
356 **complexes from *G. metallireducens* as shown in Fig. 2 in the main article.** The numbering refers to the migration order of bands obtained during  
357 Bam[(BC)<sub>2</sub>DEFGHI]<sub>2</sub> enrichment on the SDS gel (from top to bottom). Analysis of bands obtained during Bam[(B<sub>Strep</sub>C)<sub>2</sub>DEF]<sub>2</sub> enrichment identified the  
358 corresponding proteins I-V with highly similar scores; the BamGHI subunits were not identified during Bam[(B<sub>Strep</sub>C)<sub>2</sub>DEF]<sub>2</sub> enrichment.

| #           | Accession | Coverage | PSMs | Peptides | aa   | MW [kDa] | Score   | Description                                                                                                                                    |
|-------------|-----------|----------|------|----------|------|----------|---------|------------------------------------------------------------------------------------------------------------------------------------------------|
| <b>I</b>    | Gmet_2084 | 46.84    | 58   | 38       | 1014 | 111.5    | 1740.22 | <b>BamE</b>                                                                                                                                    |
|             | Gmet_1802 | 10.21    | 5    | 5        | 656  | 74.6     | 182.14  | BamB-2; Benzoyl-CoA reductase, putative                                                                                                        |
| <b>II</b>   | Gmet_2080 | 64.09    | 126  | 44       | 635  | 68.6     | 2597.42 | <b>BamH</b> ; Benzoyl-CoA reductase, putative                                                                                                  |
|             | Gmet_2087 | 41.19    | 76   | 30       | 653  | 73.8     | 2119.01 | BamB; Benzoyl-CoA reductase, putative                                                                                                          |
|             | Gmet_1802 | 32.32    | 54   | 21       | 656  | 74.6     | 1235.25 | BamB-2; Benzoyl-CoA reductase, putative                                                                                                        |
| <b>III</b>  | Gmet_2087 | 63.86    | 105  | 50       | 653  | 73.8     | 3067.47 | <b>BamB</b> ; Benzoyl-CoA reductase, putative                                                                                                  |
|             | Gmet_2080 | 28.19    | 16   | 14       | 635  | 68.6     | 500.96  | BamH; Benzoyl-CoA reductase electron transfer protein, putative                                                                                |
| <b>IV</b>   | Gmet_2085 | 70.03    | 76   | 40       | 387  | 43.2     | 1602.76 | <b>BamD</b> ; Iron-sulfur cluster-binding oxidoreductase, CCG domain pair-containing, putative benzoyl-CoA reductase electron transfer protein |
|             | Gmet_2080 | 38.11    | 29   | 18       | 635  | 68.6     | 618.35  | BamH; Benzoyl-CoA reductase electron transfer protein, putative                                                                                |
|             | Gmet_2675 | 47.66    | 36   | 18       | 384  | 43.2     | 547.02  | YhaM; 3'-to-5' exonuclease                                                                                                                     |
| <b>V</b>    | Gmet_2083 | 44.34    | 20   | 14       | 212  | 23.9     | 488.96  | <b>BamF</b> ; Benzoyl-CoA reductase electron transfer protein, selenocysteine-containing, putative                                             |
|             | Gmet_2079 | 28.90    | 8    | 6        | 218  | 23.7     | 287.46  | BamI; Iron-sulfur cluster-binding protein, putative                                                                                            |
|             | Gmet_2059 | 34.41    | 8    | 8        | 247  | 26.3     | 267.03  | Oxidoreductase, short-chain dehydrogenase/reduc. family                                                                                        |
| <b>VI</b>   | Gmet_2079 | 43.58    | 50   | 11       | 218  | 23.7     | 1126.23 | <b>BamI</b> ; Iron-sulfur cluster-binding protein, putative                                                                                    |
|             | Gmet_2086 | 48.60    | 17   | 9        | 179  | 20.1     | 491.15  | BamC; Iron-sulfur cluster-binding oxidoreductase, putative benzoyl-CoA reductase electron transfer protein                                     |
| <b>VII</b>  | Gmet_2086 | 89.39    | 51   | 25       | 179  | 20.1     | 931.69  | <b>BamC</b> ; Iron-sulfur cluster-binding oxidoreductase, putative benzoyl-CoA reductase electron transfer protein                             |
|             | Gmet_0983 | 37.74    | 8    | 6        | 159  | 17.1     | 285.71  | Biotin carboxyl carrier protein of acetyl-CoA carboxylase                                                                                      |
| <b>VIII</b> | Gmet_2081 | 49.33    | 30   | 9        | 150  | 16.5     | 759.33  | <b>BamG</b> ; Benzoyl-CoA reductase electron transfer protein                                                                                  |
|             | Gmet_2086 | 26.26    | 5    | 4        | 179  | 20.1     | 153.33  | BamC; Iron-sulfur cluster-binding oxidoreductase, putative benzoyl-CoA reductase electron transfer protein                                     |
|             | Gmet_1627 | 28.39    | 4    | 4        | 155  | 16.5     | 127.99  | 6,7-dimethyl-8-ribityllumazine synthase                                                                                                        |

359

360

361 **Table S2. Conserved noncubane [4Fe-4S] cluster-binding sequence motif in HdrB from heterodisulfide**  
 362 **reductases from methanogenic archaea and BamD from aromatic compound degrading obligately anaerobic**  
 363 **bacteria.**

364

| Organism                                        | Protein | Sequence motif                                                                                      |
|-------------------------------------------------|---------|-----------------------------------------------------------------------------------------------------|
| <i>Methanothermococcus thermolithotrophicus</i> | HdrB    | CX <sub>31</sub> CCX <sub>35</sub> CXXCX <sub>71</sub> CX <sub>39</sub> CCGAGGGX <sub>31</sub> CXXC |
| <i>Methanothermobacter marburgensis</i>         | HdrB    | CX <sub>31</sub> CCX <sub>35</sub> CXXCX <sub>71</sub> CX <sub>39</sub> CCGAGGGX <sub>31</sub> CXXC |
| <i>Geobacter metallireducens</i>                | BamD    | CX <sub>34</sub> CCX <sub>35</sub> SXXCX <sub>48</sub> CX <sub>35</sub> CCGGGGGX <sub>31</sub> CXXC |
| <i>Delsulfosarcina cetonica</i>                 | BamD    | CX <sub>34</sub> CCX <sub>35</sub> SXXCX <sub>48</sub> CX <sub>35</sub> CCGGGGGX <sub>31</sub> CXXC |
| <i>Syntrophus aciditrophicus</i>                | BamD    | CX <sub>34</sub> CCX <sub>35</sub> SXXCX <sub>48</sub> CX <sub>35</sub> CCGGGGGX <sub>31</sub> CXXC |



365 **Table S3. Conserved [Fe-S] cluster binding motifs in HdrA and BamE.** Assignment of cysteines was based on  
 366 the structural characterization of heterodisulfide/hydrogenase complex from  
 367 *Methanothermococcus thermolithotrophicus* (16).

368

| Organism                                        | Gene product | [Fe-S] cluster   | Sequence motif                                          |
|-------------------------------------------------|--------------|------------------|---------------------------------------------------------|
| <i>Methanothermococcus thermolithotrophicus</i> | HdrA         | HA1              | CX <sub>2</sub> CX <sub>2</sub> CX <sub>37</sub> C      |
|                                                 |              | HA2              | CX <sub>22</sub> CX <sub>2</sub> CX <sub>2</sub> C      |
|                                                 |              | HA3              | CXCX <sub>32</sub> CX <sub>24</sub> CX <sub>125</sub> C |
|                                                 |              | HA4              | CX <sub>12</sub> CX <sub>3</sub> CC                     |
|                                                 |              | HA5              | CX <sub>2</sub> CX <sub>2</sub> CX <sub>50</sub> C      |
|                                                 |              | HA6              | CX <sub>36</sub> CX <sub>2</sub> CX <sub>2</sub> C      |
| <i>Geobacter metallireducens</i>                | BamE         | BE1              | CX <sub>2</sub> CX <sub>2</sub> CX <sub>37</sub> C      |
|                                                 |              | BE2              | CX <sub>16</sub> CX <sub>22</sub> CX <sub>5</sub> C     |
|                                                 |              | BE4              | CX <sub>13</sub> CX <sub>3</sub> CC                     |
|                                                 |              | BE4 <sub>2</sub> | CX <sub>2</sub> CX <sub>7</sub> CX <sub>3</sub> CC      |
|                                                 |              | BE5              | CX <sub>2</sub> CX <sub>2</sub> CX <sub>35</sub> C      |
|                                                 |              | BE6              | CX <sub>36</sub> CX <sub>7</sub> CX <sub>2</sub> C      |

369

370

371 **Table S4. Conserved motifs involved in binding the two putative electron-bifurcating FADs in BamE from various obligately anaerobic, aromatic compound degrading**  
 372 **bacteria.** The highlighted glutamates (E226 and E729) and lysines (K280 and K771, notification for BamE from *G. metallireducens*), are conserved residues  
 373 involved in binding electron bifurcating FADs in HdrA-like modules (16).

| Organism                                | Gene locus    | FAD I        | Glu <sub>(Gmet226)</sub> I | Lys <sub>(Gmet280)</sub> I | FAD II       | Glu <sub>(Gmet729)</sub> II | Lys <sub>(Gmet771)</sub> II |
|-----------------------------------------|---------------|--------------|----------------------------|----------------------------|--------------|-----------------------------|-----------------------------|
| <i>Geobacter metallireducens</i>        | Gmet_2084     | IVGGGISGIQAA | TSLD <b>FER</b> ILCA       | CAYS <b>QKQ</b> VILA       | VVGGGVAGMTAA | TQLE <b>LEGE</b> IVS        | CSQAI <b>KNA</b> HKL        |
| <i>Geobacter pickeringii</i>            | GPICK_09410   | IVGGGISGIQAA | TSLD <b>FER</b> ILCA       | CAYS <b>QKQ</b> VILA       | VVGGGVAGMTAA | TQLE <b>LEGE</b> IVS        | CSQAI <b>KNA</b> HKL        |
| <i>Geobacter daltonii</i>               | Geob_0215     | IVGGGISGIQAA | TSLD <b>YER</b> ILCA       | CAYS <b>QKQ</b> VILA       | VVGGGVAGMTAA | TQLE <b>LEGE</b> IVD        | CSQAI <b>KNA</b> HKL        |
|                                         | bamE-2        | VVGGGISGIQAA | TSLD <b>YER</b> ILSS       | CAY <b>TQKQ</b> VILT       | VVGGGIAGMTSA | TSLE <b>LEER</b> IAK        | CSQSI <b>KNAL</b> KL        |
| <i>Geobacter bemidjensis</i>            | Gbem_1447     | IVGGGISGIQAA | TSLD <b>FER</b> ILCA       | CAYS <b>QKQ</b> VILA       | VVGGGVAGMTAA | TQLE <b>LEGE</b> IVA        | CSQAI <b>KNAL</b> KL        |
| <i>Geobacter pelophilus</i>             | GPELO_01f0241 | IVGGGISGIQAA | TSLD <b>FER</b> ILCA       | CAYS <b>QKQ</b> VILA       | VVGGGVAGMTAA | TQLE <b>LEGE</b> IVA        | CSQAI <b>KNAL</b> KL        |
| <i>Dethiosulfatarculus sandiegensis</i> | X474_01300    | IVGGGISGIQAA | TSMD <b>YER</b> LLCA       | CTYT <b>QKQ</b> VILT       | VVGGGMAGMTAS | TNLE <b>FEK</b> LAG         | CSHSI <b>KNAL</b> KL        |
| <i>Desulfomonile tiedjei</i>            | Desti_1915    | IVGGGVSGIQAS | TSMD <b>YER</b> LLSS       | CTYT <b>QKQ</b> VILT       | VVGGGIAGMNCA | THLE <b>LEEG</b> IAR        | CSES <b>VKNAL</b> KL        |
| <i>Desulfobacula toluolica</i>          | hdlA9         | IVGGGISGIQAS | TSLD <b>YER</b> LLCS       | CTYT <b>QKQ</b> VILT       | VVGGGLAGMTGS | TQLD <b>LEEN</b> IFK        | CTHAI <b>KNAL</b> KL        |
|                                         | Desgi_0481    | IVGGGISGIQAS | TSMD <b>FER</b> LLSA       | CTYA <b>QKQ</b> VILT       | VVGGGIAGMNCA | THLE <b>LEEK</b> TAK        | CSES <b>IKNAL</b> KL        |
|                                         | Desgi_1112    | IVGGGISGIQAS | TSMD <b>YER</b> LLCS       | CTYT <b>QKQ</b> VILT       | VVGGGLAGMTSA | THLE <b>LEEQ</b> IAK        | CSES <b>IKNAL</b> KL        |
| <i>Desulfotomaulum gibsoniae</i>        | Desgi_1980    | IVGGGISGIQAS | TSMD <b>YER</b> LLCS       | CTYT <b>QKQ</b> VILT       | VVGGGLAGMTSA | THLE <b>LEEQ</b> IAK        | CSES <b>IKNAL</b> KL        |
|                                         | Desgi_1974    | IVGGGISGIQAS | TSMD <b>FER</b> LLSS       | CTYA <b>QKH</b> VILT       | VVGGGIAGMNCA | THLE <b>LEEQ</b> IAG        | CSES <b>IKNAL</b> KL        |
|                                         | Desgi_3841    | IVGGGISGIQAS | TSMD <b>FER</b> LLSS       | CTYA <b>QKQ</b> VILT       | VVGGGIAGMNCA | THLE <b>LEEK</b> TAK        | CSES <b>IKNAL</b> KL        |
| <i>Desulfotigum phosphitoxidans</i>     | hdrA4         | IVGGGISGIQAS | TSLD <b>YER</b> LLCA       | CTYT <b>QKQ</b> VILT       | VVGGGVAGMTSA | TQLA <b>LEEK</b> LSS        | CTHAV <b>KNAL</b> AL        |
| <i>Desulfococcus multivorans</i>        | dsmv_2376     | VVGGGISGVQAS | TSIQ <b>FER</b> ILSA       | CMYAT <b>KQAV</b> LA       | VVGGGIAGMTSA | THLE <b>LED</b> RIAK        | CGQS <b>VKHAL</b> KL        |
| <i>Desulfosarcina cetonica</i>          | n.a.          | VVGGGISGIQAA | TSLD <b>FER</b> ILCS       | CAY <b>TQKQ</b> VILA       | VVGGGIAGMTSA | TSIE <b>LEEM</b> IAG        | CSHSI <b>KNAL</b> KL        |
| <i>Desulfocarbo indianensis</i>         | AAU61_09850   | VVGGGISGIQAS | TSMD <b>YER</b> LLSS       | CTYT <b>QKQ</b> VILT       | VVGGGIAGMTCA | TQVE <b>LEEK</b> IVN        | CGHAI <b>KNAL</b> KL        |
|                                         | SYN_00626     | IVGGGISGIQAA | TGLD <b>YER</b> LLCA       | CTYT <b>QKQ</b> VILT       | VVGGGIAGMTSA | TQLE <b>LEER</b> IAR        | CSHAI <b>KNAL</b> KL        |
| <i>Syntrophus aciditrophicus</i>        | SYN_01645     | VVGGGISGIQAS | TSMD <b>FER</b> LLSA       | CTYN <b>QKQ</b> VILT       | VVGGGIAGMTCA | TQLE <b>LEER</b> IAK        | CSHAV <b>KNAL</b> KL        |
|                                         | SYN_02423     | VVGGGISGIQAS | TSMD <b>FER</b> LLSA       | CTYN <b>QKQ</b> VILT       | VVGGGVAGMTCS | TQLD <b>LEEW</b> IAE        | CTHAI <b>KNAL</b> KL        |
|                                         | SYN_03215     | VVGGGISGIQAS | TSMD <b>FER</b> LLSA       | CTYS <b>QKH</b> AILT       | IVGGGVAGMVCA | TQLE <b>LEEK</b> IAR        | CSHAV <b>KNAL</b> KL        |

374 n.a. = not available

375

**Table S5. Conserved [2Fe-2S] cluster-binding sequence motif in MvhD and BamF.**

| <b>Organism</b>                                                                                                       | <b>Enzyme</b> | <b>Sequence motif</b>                                               |
|-----------------------------------------------------------------------------------------------------------------------|---------------|---------------------------------------------------------------------|
| <i>Methanothermococcus thermolithotrophicus</i>                                                                       | MvhD          | CX <sub>2</sub> CX <sub>25</sub> CX <sub>24</sub> CX <sub>4</sub> C |
| <i>Methanothermobacter marburgensis</i>                                                                               | MvhD          | CX <sub>2</sub> CX <sub>25</sub> CX <sub>24</sub> CX <sub>4</sub> C |
| <i>Geobacter metallireducens</i>                                                                                      | BamF          | CX <sub>2</sub> UX <sub>25</sub> CX <sub>24</sub> CX <sub>4</sub> C |
| <i>Desulfosarcina cetonica</i>                                                                                        | BamF          | CX <sub>2</sub> UX <sub>25</sub> CX <sub>24</sub> CX <sub>4</sub> C |
| <i>Syntrophus aciditrophicus</i>                                                                                      | BamF          | CX <sub>2</sub> UX <sub>25</sub> CX <sub>24</sub> CX <sub>4</sub> C |
| <p>C: involved in [2Fe-2S] cluster coordination<br/>           C/U: not involved in [2Fe-2S] cluster coordination</p> |               |                                                                     |

**Table S6. Extinction coefficients determined in different Bam complexes under varying conditions.**

| Condition                  | Complex/extinction coefficient [ $M^{-1} \text{ cm}^{-1}$ ] |                         |                                          |                                          |
|----------------------------|-------------------------------------------------------------|-------------------------|------------------------------------------|------------------------------------------|
|                            | $(BC)_2$                                                    | $(B_{\text{Strep}}C)_2$ | $[(B_{\text{Strep}}C)_2DEF]_2$           | $[(BC)_2DEFGHI]_2$                       |
| Oxidized as isolated       | $\epsilon_{398\text{nm}} = 41,400$                          | n.d.                    | $\epsilon_{400\text{nm}} = 103,800$      | $\epsilon_{401\text{nm}} = 156,400$      |
| Oxidized minus reduced by  |                                                             |                         |                                          |                                          |
| - 1,5-dienoyl-CoA          | $\Delta\epsilon_{409\text{nm}} = 28,700$                    | n.d.                    | $\Delta\epsilon_{409\text{nm}} = 49,700$ | $\Delta\epsilon_{409\text{nm}} = 94,400$ |
| - sodium dithionite        | $\Delta\epsilon_{409\text{nm}} = 10,600$                    | n.d.                    | $\Delta\epsilon_{409\text{nm}} = 37,600$ | $\Delta\epsilon_{409\text{nm}} = 78,000$ |
| - reduced ferredoxin       | $\Delta\epsilon_{409\text{nm}} = 3,700$                     | n.d.                    | $\Delta\epsilon_{409\text{nm}} = 30,300$ | $\Delta\epsilon_{409\text{nm}} = 56,300$ |
| - NADH                     | n.d.                                                        | n.d.                    | $\Delta\epsilon_{409\text{nm}} = 7,300$  | $\Delta\epsilon_{409\text{nm}} = 10,900$ |
| <i>n.d.</i> not determined |                                                             |                         |                                          |                                          |

**Table S7. Combination of enzyme fractions, electron donors/acceptors used in assays monitoring FBEB-driven benzoyl-CoA reduction.** DCPIP: 2,6-Dichlorophenolindophenol; PMSF: phenylmethylsulfonyl fluoride; Ferrocenium = ferrocenium tetrafluoroborate and hexafluorophosphate.

| Enzyme fraction                                           | Electron donor (mM)                                 | High-potential electron acceptor (mM)                                                                                                                                       |
|-----------------------------------------------------------|-----------------------------------------------------|-----------------------------------------------------------------------------------------------------------------------------------------------------------------------------|
| Crude extract (soluble and membrane fraction)             | Fd <sup>-</sup> (0.5, KGOR <sub>Taro</sub> reduced) | NAD(P) <sup>+</sup> (1-2), Menadione (1-2), Glutathione (1-2), Cystine (1-2), Potassium ferrocyanide (2), Nitrate (5-10), Nitrite (5-10), Ferrocenium (0,5), Fumarate (1-2) |
|                                                           | Ti(III)-citrate (5)                                 | NAD(P) <sup>+</sup> (1-2), Menadione (1-2), Cystine (1-2), Nitrate (5-10), Nitrite (5-10)                                                                                   |
|                                                           | Formate (10)                                        | NAD(P) <sup>+</sup> (1-2), Menadione (1-2), Glutathione (1-2), Cystine (1-2)                                                                                                |
|                                                           | NAD(P)H (1-2)                                       | Menadione (1-2), Glutathione (1-2), Cystine (1-2), Potassium ferrocyanide (2), Nitrate (10), Nitrite (10), DCPIP (2), PMSF (2), Ferrocenium (0.5)                           |
| Bam[(B <sub>Strep</sub> C) <sub>2</sub> DEF] <sub>2</sub> | Ferredoxin (0.5)                                    | NAD(P) <sup>+</sup> (1-2), Menadione (1-2), Glutathione disulfide (1-2), Cystine (1-2), Potassium ferrocyanide (2), DCPIP (2), Ferrocenium (0.5)                            |
| Bam[(BC) <sub>2</sub> DEFGHI] <sub>2</sub>                | Fd <sup>-</sup> (0.5, KGOR <sub>Taro</sub> reduced) | NAD(P) <sup>+</sup> (1-2), Menadione (1-2), Glutathione (1-2), Cystine (1-2), Potassium ferrocyanide (2), DCPIP (2), Ferrocenium (0.5)                                      |
|                                                           | Ti(III)-citrate (5)                                 | NAD(P) <sup>+</sup> (1-2), 1,5-dienoyl-CoA (1-2)                                                                                                                            |
|                                                           | NAD(P)H (1-2)                                       | NAD(P) <sup>+</sup> (1-2), Glutathione (1-2), Cystine (1-2), DCPIP (2), PMSF (2), Ferrocenium (0.5)                                                                         |

**Table S8. Distribution of the BamB-specific DCO activity in differentially lysed *G. metallireducens* cells grown with benzoate.**

| <b>Lysis method</b>                   | <b>Activity in<br/>membrane fraction [%]</b> | <b>Activity in<br/>soluble fraction [%]</b> |
|---------------------------------------|----------------------------------------------|---------------------------------------------|
| French-Press                          | 30                                           | 60                                          |
| Thawing and freezing (3x)             | 45                                           | 55                                          |
| Lysozyme                              | 42                                           | 54                                          |
| French-Press + 0.5 M KCl              | 16                                           | 81                                          |
| Thawing and freezing (3x) + 0.5 M KCl | 2                                            | 95                                          |
| Lysozyme + 0.5 M KCl                  | 3                                            | 92                                          |

**Table S9: Plasmids used.**

| <b>Plasmids</b>                                                                                                                                                                                                                                  | <b>Relevant characteristics</b>                                                                                                                                                                                          | <b>Source/reference</b>        |
|--------------------------------------------------------------------------------------------------------------------------------------------------------------------------------------------------------------------------------------------------|--------------------------------------------------------------------------------------------------------------------------------------------------------------------------------------------------------------------------|--------------------------------|
| pBBR1MCS-2                                                                                                                                                                                                                                       | Km <sup>r</sup> , broad-host-range cloning vector                                                                                                                                                                        | Kovach <i>et al.</i> 1995 (17) |
| pGM2087e1                                                                                                                                                                                                                                        | Km <sup>r</sup> , pBBR1MCS-2 (source plasmid) with sequence 198 bp upstream of <i>bamB</i> and encoding BamB with a C-terminal Strep-tag II <sup>®</sup> (BamB <sub>Strep</sub> ) on a 2190-bp <i>XhoI/SpeI</i> fragment | this work                      |
| pPR-IBA101                                                                                                                                                                                                                                       | Amp <sup>r</sup> , MCS with C-terminally encoded Twin-Strep-tag <sup>®</sup>                                                                                                                                             | IBA GmbH, Göttingen, D         |
| pPR-GM2087e10                                                                                                                                                                                                                                    | Amp <sup>r</sup> , pPR-IBA101(source plasmid), used for combination of sequence encoding BamB with Twin-Step-tag <sup>®</sup>                                                                                            | this work                      |
| pGM2087e10                                                                                                                                                                                                                                       | Km <sup>r</sup> , pPR-GM2087e10 and pGM2087e1 (source plasmids), same plasmid as pGM2087e1 but sequence encoding BamB with C-terminal Twin-Strep-tag <sup>®</sup> (BamB <sub>2xStrep</sub> )                             | this work                      |
| Abbreviations: ampicillin resistance (Amp <sup>r</sup> ), kanamycin resistance (Km <sup>r</sup> ), subscript ‘Strep’ refers to a C-terminal Strep-tag II <sup>®</sup> , subscript ‘2xStrep’ refers to a C-terminal Twin-Strep-tag <sup>®</sup> . |                                                                                                                                                                                                                          |                                |

## References

1. Lovely DR, Giovannoni SJ, White DC, Champine JE, Phillips EJP, Gorby YA. & Goodwin, S. (1993) *Geobacter metallireducens* gen. nov. sp. nov., a microorganism capable of coupling the complete oxidation of organic compounds to the reduction of iron and other metals. *Arch Microbiol* 159:336-344.
2. Green MR & Sambrook J (2012) Molecular cloning: a laboratory manual, p. 1890. Cold Spring Harbor Laboratory Press, Cold Spring Harbor, NY, USA
3. Cheng HR and Jiang N (2006) Extremely rapid extraction of DNA from bacteria and yeasts. *Biotechnol Lett* 28:55-59.
4. Oberender J, Kung JW, Seifert J, von Bergen M & Boll M (2012) Identification and characterization of a succinyl-coenzyme A (CoA):benzoate CoA transferase in *Geobacter metallireducens*. *J Bacteriol* 194:2501-2508.
5. Kung JW *et al.* (2009) Identification and characterization of the tungsten-containing class of benzoyl-coenzyme A reductases. *Proc Natl Acad Sci USA* 106:17687-92.
6. Schächter D & Taggert JV (1953) Benzoyl coenzyme A and hippurate synthesis. *J Biol Chem* 203:925-934.
7. Boll M, Laempe D, Eisenreich W, Mittelberger T, Heinze J, Bacher A & Fuchs G (2000) Non-aromatic products from anoxic conversion of benzoyl-CoA reductase and dienoyl-CoA hydratase. *J Biol Chem* 275:21889-21895.
8. Tiedt O, Fuchs J, Eisenreich W & Boll M (2018) A catalytically versatile benzoyl-CoA reductase, key enzyme in the degradation of methyl- and halobenzoates in denitrifying bacteria. *J Biol Chem* 294:10264-10274.
9. Schönheit P, Wäscher C & Thauer RK (1978) A rapid procedure for the purification of ferredoxin from clostridia using polyethylenimine. *FEBS Lett* 89:219-222.
10. Dörner E & Boll M (2002) Properties of 2-oxoglutarate:ferredoxin oxidoreductase from *Thauera aromatica* and its role in enzymatic reduction of the aromatic ring. *J Bacteriol* 184:3975-3983.
11. Bastida F *et al.* (2010) Elucidating MTBE degradation in a mixed consortium using a multidisciplinary approach. *FEMS Microbiol Ecol* 73:370-384.
12. Lovenberg W, Buchanan BB & Rabinowitz JC (1963) Studies on the chemical nature of clostridial ferredoxin. *J Biol Chem* 238:3899-3913.
13. Edgar RC (2004) MUSCLE: multiple sequence alignment with high accuracy and high throughput. *Nucleic Acids Res* 32:1792-1797.
14. Saitu N & Nei M (1987) The Neighbor-joining Method: A New Method for Reconstructing Phylogenetic Trees. *Mol Biol Evol* 4:406-425.
15. Rachel R *et al.* (2010) Analysis of the Ultrastructure of Archaea by Electron Microscopy. *Methods Cell Biol* 96:47-69.
16. Wagner T, Koch J, Ermler U & Shima S. (2017) Methanogenic heterodisulfide reductase (HdrABC-MvhAGD) uses two noncubane [4Fe-4S] clusters for reduction. *Science* 357:699-703.
17. Kovach ME *et al.* (1995) Four new derivatives of the broad-host-range cloning vector pBBR1MCS, carrying different antibiotic-resistance cassettes. *Gene* 166:175-176.
